# Supplementary material for: Dimensions and distribution of household energy insecurity in the United States
Source: Research Square preprint supplement (doi:10.21203/rs.3.rs-6622001/v1), 2025-05-14
Supplement: Supplementary file 1 [file 78cb24f10e0ef75ce588f878.docx]

**Supplementary Information**

**Supplementary Information 1: Spatial distribution of energy insecurity indicators across the contiguous U.S.**


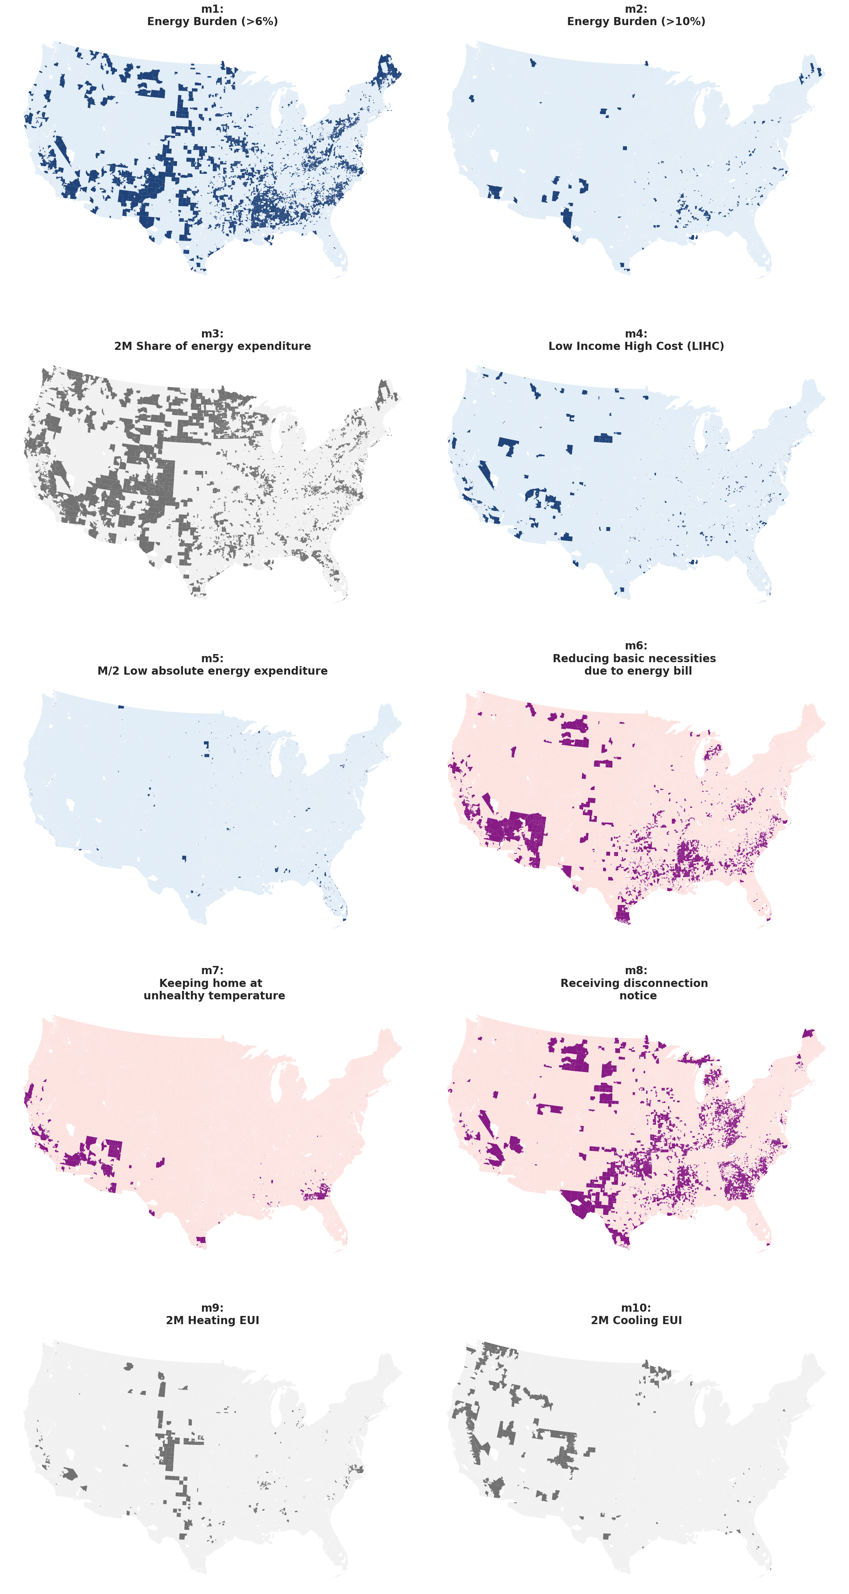


Figure S1: Maps showing tract-level incidence of ten modeled energy insecurity indicators across economic (blue), behavioral (pink), and physical (grey) dimensions. These maps visualize where average (“typical”) households per tract experience each form of energy insecurity.

**Supplementary Information 2: Energy insecurity trends across climatic, geographic, and cost variables.**

Figure S2: Distribution of energy insecurity metrics by key geographic and environmental variables. Subplots show trends between contiguous indicators for economic (blue), behavioral (pink), and physical (grey) dimensions of EI versus percentile values of cooling degree days, rurality, and energy prices.

**Supplementary Information 3: Per capita distribution of heating and cooling energy use intensity**

Figure S3: Per capita heating and cooling energy use intensity (EUI) across census tracts, stratified by race/ethnicity and gender. Trends are shown controlling for household income, highlighting structural disparities in building energy efficiency.

**Supplementary Information 4: Disparities in self-reported energy insecurity indicators and energy burden across income and demographics**

Figure S4: Trends in self-reported energy insecurity (e.g., coping behaviors) and energy burden, stratified by income and majority race/ethnicity or gender. Results show differential exposure to insecurity and trade-offs at equivalent income levels.

**Supplementary Information 5: Relationship between levels of energy insecurity levels and household income**

Figure S5: Number of positive energy insecurity indicators (out of 10) plotted against household income at the census tract level.

**Supplementary Information 6: Variables used in energy insecurity indicator prediction**

Table S1. Summary of independent variables from the American Community Survey (ACS) and RECS used in model development, including their descriptions and mapping between ACS and RECS sources. Description of dependent variables from RECS predicted through classification and regression algorithms also included.

|  | **ACS Variable** | **Description** | **Source** | **Corresponding RECS Variable** |
| --- | --- | --- | --- | --- |
| Independent variables | **State** | State FIPS code | ACS | STATE_FIPS |
| **Census Division** | Census division | Derived from state | DIVISION |
| **Climate Region** | IECC climate codes | DOE Building America Code | IECC_climate_code |
| **Cooling Degree Days (CDD)** | Annual cooling degree days for the region | CoolClimate | CDD30YR_PUB |
| **Heating Degree Days (HDD)** | Annual heating degree days for the region | CoolClimate | HDD30YR_PUB |
| **Average year built** | Median or range of year homes were built | ACS | YEARMADERANGE |
| **Average number of bedrooms** | Total number of bedrooms in housing unit | ACS | BEDROOMS |
| **Average number of rooms** | Total number of rooms in housing unit | ACS | TOTROOMS |
| **Average household members** | Total number of household members | ACS | NHSLDMEM |
| **Average household income** | Household income in past 12 months (adjusted) | ACS | MONEYPY |
| **Electricity cost** | Total annual electricity bill | LEAD | DOLLAREL |
| **Natural gas cost** | Total annual natural gas bill | LEAD | DOLLARNG |
| **Fuel oil cost** | Total annual fuel oil bill | LEAD | DOLLAROF |
| **Percent rural population** | Rurality classification | U.S. Census | UATYP10 |
| **Housing unit type** | Structure type (e.g., detached, mobile home) | ACS | TYPEHUQ |
| **Primary heating fuel** | Main fuel used for space heating | ACS | FUELHEAT |
| **Tenure (owner/renter)** | Owner-occupied or renter-occupied home | ACS | KOWNRENT |
| Dependent variables | **Total electricity use (kBtu)** | Annual electricity consumption | RECS | BTUEL |
| **Total natural gas use (kBtu)** | Annual natural gas consumption | RECS | BTUNG |
| **Total fuel oil use (kBtu)** | Annual fuel oil consumption | RECS | BTUOF |
| **Total energy use (kBtu)** | Sum of all energy use | RECS | TOTALBTU |
| **Heating energy use intensity** | Heating load per square foot | RECS | EUI_TOTALBTUSPH |
| **Cooling energy use intensity** | Cooling load per square foot | RECS | EUI_BTUELCOL |
| **Probability of reducing necessities due to energy bill** | Modeled odds of skipping essentials due to energy bills | RECS | SCALEB_pred |
| **Probability of unhealthy temperature** | Probability of under-heating or under-cooling | RECS | SCALEG |
| **Probability of receiving disconnection notice** | Probability of having received utility shutoff notice | RECS | SCALEE |

**Supplementary Information 7: Summary of predictive model performance for quantitative energy indicators.**

Table S2: Out-of-sample model performance statistics (R²) for regression-based predictions of electricity, gas, and fuel consumption, total energy usage, and heating/cooling EUI. Results shown across all tested algorithms.

| **Model** | **Electricity consumption** | **Natural gas consumption** | **Other Fuel consumption** | **Cooling EUI** | **Heating EUI** | **Total energy consumption** |
| --- | --- | --- | --- | --- | --- | --- |
| Linear regression* | 0.8335 | 0.8419 | 0.9495 | 0.2321 | 0.5182 | 0.8389 |
| Ridge regression | 0.9024 | 0.9454 | 0.9704 | 0.1489 | 0.5519 | 0.9329 |
| Lasso regression | 0.9062 | 0.9467 | **0.9720** | 0.2651 | 0.5718 | 0.9348 |
| Elastic Net regression | 0.8962 | 0.9379 | 0.9689 | **0.2771** | 0.5858 | 0.9253 |
| K Nearest Neighbor | 0.7137 | 0.8305 | 0.8992 | 0.2330 | 0.5310 | 0.7729 |
| Artificial Neural Network | **0.9118** | **0.9495** | 0.9678 | 0.0444 | 0.5444 | **0.9352** |
| Bagging | 0.1117 | 0.1288 | 0.0897 | 0.0003 | 0.0979 | 0.1467 |
| Random Forest | 0.4260 | 0.6005 | 0.4204 | 0.1153 | 0.3226 | 0.4998 |
| Gradient Boosting | 0.8464 | 0.9195 | 0.9600 | 0.2486 | **0.5904** | 0.8768 |
| Ada Boosting | 0.7355 | 0.8313 | 0.9452 | 0.1295 | 0.3148 | 0.6377 |

***with no feature engineering**

**Supplementary Information 8: Summary of predictive model performance for qualitative energy insecurity indicators**

Table S3: Area under the ROC curve (AUROC) and precision-recall curve (AUC PR) for classification models predicting coping behaviors and shutoff risk. Performance shown for each algorithm tested.

| **Model** | **Keeping home at unhealthy temperature** | | **Reducing basic necessities due to energy bill** | | **Receiving disconnection notice** | |
| --- | --- | --- | --- | --- | --- | --- |
|  | **AUROC** | **AUC PR** | **AUROC** | **AUC PR** | **AUROC** | **AUC PR** |
| Logistic regression | **0.7228** | **0.1801** | **0.7992** | **0.4231** | **0.7915** | **0.2363** |
| K- Nearest Neighbor | 0.6323 | 0.1330 | 0.7358 | 0.3455 | 0.6900 | 0.1738 |
| Artificial Neural Network | 0.6880 | 0.1821 | 0.7883 | 0.3943 | 0.7596 | 0.2040 |
| Bagging | 0.6723 | 0.1380 | 0.7277 | 0.3282 | 0.6625 | 0.1450 |
| Random Forest | 0.6113 | 0.1255 | 0.6911 | 0.2913 | 0.6141 | 0.1077 |
| Gradient Boosting | **0.7244** | **0.1935** | **0.8010** | **0.4241** | 0.7887 | 0.2221 |
| Ada Boosting | 0.7185 | 0.1726 | 0.7930 | 0.4141 | 0.7785 | 0.2180 |
| Support Vector Classifier | 0.6929 | 0.1608 | 0.7970 | 0.4132 | 0.7671 | 0.2221 |

**Supplementary Information 9:** State-level thresholds used for binary versions of energy insecurity indicators classification

Table S4: State-specific thresholds used to define relative energy insecurity metrics, including 2M energy burden, M/2 energy bill, and thresholds for heating and cooling energy use intensity. Includes state-level fuel prices used in calculations.

| **State** | **Electricity Price ($/kWh)** | **Natural Gas Price ($/therm)** | **Propane Price ($/gal)** | **Fuel Oil Price ($/gal)** | **2M Energy Burden (%)** | **M/2 Energy Bill ($)** | **2M Heating EUI (kBtu/ft2)** | **2M Cooling EUI (kBtu/ft2)** |
| --- | --- | --- | --- | --- | --- | --- | --- | --- |
| Alabama | 0.13 | 1.54 | 2.57 | 3.24 | 9.85 | 1236.74 | 42.12 | 14.11 |
| Arizona | 0.12 | 1.26 | 2.42 | 3.24 | 4.39 | 718.20 | 50.04 | 11.67 |
| Arkansas | 0.10 | 1.18 | 2.19 | 3.24 | 8.08 | 939.45 | 53.37 | 14.95 |
| California | 0.20 | 1.36 | 2.42 | 3.24 | 4.49 | 916.89 | 49.99 | 9.90 |
| Colorado | 0.12 | 0.70 | 2.12 | 3.24 | 2.99 | 611.65 | 41.54 | 13.57 |
| Connecticut | 0.22 | 1.41 | 2.98 | 3.31 | 8.09 | 1635.16 | 42.65 | 22.37 |
| Delaware | 0.12 | 1.25 | 3.15 | 3.13 | 6.43 | 1076.31 | 39.30 | 14.66 |
| District of Columbia | 0.12 | 1.15 | 3.22 | 4.04 | 2.66 | 745.41 | 54.89 | 14.93 |
| Florida | 0.11 | 2.06 | 4.78 | 2.88 | 2.29 | 355.08 | 37.40 | 7.73 |
| Georgia | 0.12 | 1.49 | 2.32 | 2.88 | 7.31 | 1134.85 | 48.45 | 12.49 |
| Idaho | 0.10 | 0.65 | 2.46 | 3.24 | 5.79 | 843.75 | 32.72 | 16.92 |
| Illinois | 0.13 | 0.76 | 1.64 | 2.66 | 4.89 | 830.94 | 75.28 | 17.40 |
| Indiana | 0.13 | 0.83 | 2.05 | 2.75 | 7.03 | 979.74 | 52.24 | 19.25 |
| Iowa | 0.12 | 0.75 | 1.33 | 2.45 | 7.42 | 1082.71 | 79.57 | 20.28 |
| Kansas | 0.13 | 0.90 | 1.54 | 2.66 | 7.72 | 1148.31 | 80.80 | 17.50 |
| Kentucky | 0.11 | 1.07 | 2.23 | 2.67 | 7.44 | 936.34 | 32.72 | 16.02 |
| Louisiana | 0.10 | 1.17 | 2.45 | 3.24 | 6.14 | 762.84 | 54.70 | 14.68 |
| Maine | 0.17 | 1.43 | 3.00 | 3.01 | 9.58 | 1441.88 | 38.12 | 23.43 |
| Maryland | 0.13 | 1.26 | 3.28 | 3.23 | 5.12 | 1174.69 | 36.18 | 14.58 |
| Massachusetts | 0.21 | 1.42 | 3.14 | 3.27 | 6.05 | 1252.12 | 42.78 | 20.53 |
| Michigan | 0.16 | 0.79 | 2.02 | 2.68 | 5.54 | 857.87 | 66.50 | 21.03 |
| Minnesota | 0.13 | 0.77 | 1.62 | 2.66 | 2.96 | 576.65 | 47.94 | 19.02 |
| Mississippi | 0.11 | 1.11 | 2.53 | 3.24 | 11.54 | 1308.07 | 48.51 | 13.97 |
| Missouri | 0.11 | 1.00 | 1.77 | 2.66 | 7.29 | 1033.13 | 52.88 | 17.50 |
| Montana | 0.11 | 0.70 | 1.89 | 3.24 | 6.00 | 850.41 | 40.68 | 25.50 |
| Nebraska | 0.11 | 0.77 | 1.34 | 2.53 | 7.39 | 1096.07 | 54.90 | 20.71 |
| Nevada | 0.11 | 1.00 | 2.42 | 3.24 | 5.58 | 930.89 | 50.22 | 12.73 |
| New Hampshire | 0.18 | 1.41 | 3.28 | 3.11 | 7.08 | 1384.21 | 39.51 | 21.63 |
| New Jersey | 0.16 | 0.96 | 3.85 | 3.30 | 4.44 | 985.74 | 58.89 | 17.44 |
| New Mexico | 0.13 | 0.68 | 2.42 | 3.24 | 7.08 | 857.83 | 54.17 | 14.50 |
| New York | 0.18 | 1.23 | 3.27 | 3.54 | 4.10 | 686.72 | 48.35 | 21.21 |
| North Carolina | 0.11 | 1.27 | 2.82 | 2.89 | 6.54 | 905.48 | 30.99 | 12.56 |
| North Dakota | 0.10 | 0.66 | 1.42 | 2.66 | 3.60 | 608.57 | 42.15 | 23.66 |
| Ohio | 0.12 | 0.92 | 2.67 | 2.69 | 6.93 | 943.82 | 57.21 | 19.38 |
| Oklahoma | 0.10 | 0.88 | 1.91 | 3.24 | 6.59 | 891.18 | 68.28 | 16.12 |
| Oregon | 0.11 | 1.05 | 2.42 | 3.24 | 4.56 | 764.95 | 24.72 | 11.85 |
| Pennsylvania | 0.13 | 1.11 | 3.04 | 2.87 | 7.54 | 1174.60 | 45.57 | 21.51 |
| Rhode Island | 0.22 | 1.45 | 3.54 | 3.36 | 9.02 | 1485.81 | 46.70 | 20.09 |
| South Carolina | 0.13 | 1.30 | 3.23 | 2.88 | 9.12 | 1216.03 | 35.53 | 12.94 |
| South Dakota | 0.12 | 0.68 | 1.48 | 2.66 | 4.41 | 738.82 | 49.84 | 21.12 |
| Tennessee | 0.11 | 0.86 | 3.02 | 3.24 | 7.14 | 936.19 | 32.20 | 14.06 |
| Texas | 0.12 | 1.12 | 2.44 | 3.24 | 5.61 | 877.01 | 50.55 | 12.51 |
| Utah | 0.10 | 0.79 | 2.55 | 3.24 | 3.63 | 727.14 | 47.29 | 14.52 |
| Vermont | 0.20 | 1.27 | 3.46 | 2.86 | 7.70 | 1245.14 | 42.04 | 24.90 |
| Virginia | 0.12 | 1.23 | 3.10 | 2.88 | 5.62 | 1066.14 | 33.41 | 13.94 |
| Washington | 0.10 | 1.06 | 2.42 | 3.24 | 3.40 | 683.00 | 24.68 | 10.92 |
| West Virginia | 0.12 | 0.97 | 3.22 | 3.29 | 8.79 | 1015.49 | 33.72 | 17.51 |
| Wisconsin | 0.14 | 0.72 | 1.57 | 2.69 | 2.70 | 462.18 | 43.49 | 20.66 |
| Wyoming | 0.11 | 0.85 | 2.17 | 3.24 | 3.16 | 507.34 | 47.51 | 20.31 |

**Supplementary Information 10: Energy assistance program coverage and eligibility criteria**

Table S5: Summary of energy assistance programs by type, coverage, **and eligibility rules**. Includes number of utilities with each program and the percentage of utilities or states covered.

| **Program Type** | **Number of utilities with program** | **% of Utilities covered** |
| --- | --- | --- |
| Any cold-based protection | 722 | 78.6 |
| Any heat-based protection | 407 | 44.3 |
| Appliance Rebate | 111 | 12.1 |
| Bill assistance | 34 | 3.7 |
| Budget billing | 2 | 0.2 |
| Electrical repairs | 1 | 0.1 |
| HEEHRA | 165 | 18.0 |
| LIHEAP | 918 | 100.0 |
| No Program | 715 | 77.9 |
| PIPP | 26 | 2.8 |
| State/Utility Weatherization | 182 | 19.8 |
| WAP | 918 | 100.0 |
